# Supplementary material for: Three distinct mutational mechanisms acting on a single gene underpin the origin of yellow flesh in peach
Source: PubMed Central journal article supplement — Plant J. 2013 Aug 8;76(2):175–87. doi: 10.1111/tpj.12283 (PMC4223380; doi:10.1111/tpj.12283), 2013-08-08
Supplement: tpj0076-0175-sd2.pdf [file tpj0076-0175-sd2.pdf]

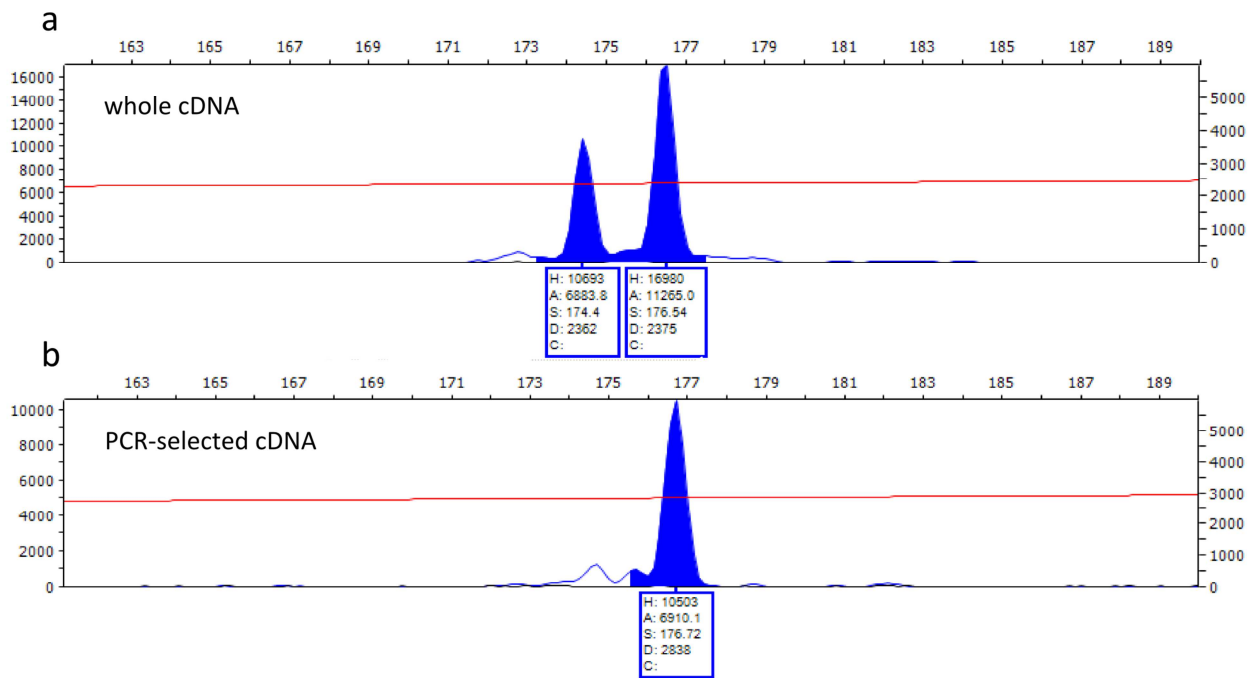

**Figure S2. Microsatellite analysis carried out on cDNA from Redhaven fruit flesh.** On the total cDNA, the (TC)<sub>7</sub> and the (TC)<sub>8</sub> alleles were detected (a), whereas a single peak was detected (b) when traditional and long-range PCR approaches were adopted in order to select only complete PpCCD4 transcripts.
