# Supplementary material for: Three distinct mutational mechanisms acting on a single gene underpin the origin of yellow flesh in peach
Source: PubMed Central journal article supplement — Plant J. 2013 Aug 8;76(2):175–87. doi: 10.1111/tpj.12283 (PMC4223380; doi:10.1111/tpj.12283), 2013-08-08
Supplement: tpj0076-0175-sd3.pdf [file tpj0076-0175-sd3.pdf]

|                   |     |     |     |     |     |     |     |     |     |     |     |     |     |     |     |     |     |     |     |     |
|-------------------|-----|-----|-----|-----|-----|-----|-----|-----|-----|-----|-----|-----|-----|-----|-----|-----|-----|-----|-----|-----|
| (TC) <sub>7</sub> | ATG | GAT | GCC | TTC | TCT | TCC | TCT | TTC | CTA | TCC | ACA | TTT | CCC | ACT | CAA | AAT | CTC | TCT | CTC | TCT |
| SNP               | ATG | GAT | GCC | TTC | TCT | TCC | TCT | TTC | CTA | TCC | ACA | TTT | CCC | ACT | CAA | AAT | CTC | TCT | CTC | TCT |
| (TC) <sub>8</sub> | ATG | GAT | GCC | TTC | TCT | TCC | TCT | TTC | CTA | TCC | ACA | TTT | CCC | ACT | CAA | AAT | CTC | TCT | CTC | TCT |
|                   |     |     |     | X   |     |     |     |     |     |     |     |     |     |     |     |     |     |     |     |     |
| (TC) <sub>7</sub> | CCT | GCC | ATA | GCA | ACC | CCC | AAG | TTC | AGC | ATT | TCC | TCT | GTT | AGA | ATT | GAA | GAA | AGA | CCA | TCA |
| SNP               | CCT | GCC | ATA | GCA | ACC | CCC | AAG | TTC | AGC | ATT | TCC | TCT | GTT | AGA | ATT | GAA | GAA | AGA | CCA | TCA |
| (TC) <sub>8</sub> | CTC | CTG | CCA | TAG |     |     |     |     |     |     |     |     |     |     |     |     |     |     |     |     |
| (TC) <sub>7</sub> | AGC | CCA | CCA | CCA | GCT | TCA | AAA | CCC | ACC | TCC | ACA | AAA | GCA | CCA | CAG | CCT | CCA | AAA | ACT | CCA |
| SNP               | AGC | CCA | CCA | CCA | GCT | TCA | AAA | CCC | ACC | TCC | ACA | AAA | GCA | CCA | CAG | CCT | CCA | AAA | ACT | CCA |
| (TC) <sub>7</sub> | TCC | CCG | CCA | CTA | ACA | ACA | AAA | GCT | CGC | GAT | TAC | AAC | AAT | GCT | TCA | ACA | TTC | TCT | GCG | GCA |
| SNP               | TCC | CCG | CCA | CTA | ACA | ACA | AAA | GCT | CGC | GAT | TAC | AAC | AAT | GCT | TCA | ACA | TTC | TCT | GCG | GCA |
| (TC) <sub>7</sub> | AAA | AAA | GGA | ACA | GAT | CCT | ACG | CTA | CCT | GCG | GTG | ATC | TTC | AAC | GCT | TTG | GAT | GAC | ATC | ATA |
| SNP               | AAA | AAA | GGA | ACA | GAT | CCT | ACG | CTA | CCT | GCG | GTG | ATC | TTC | AAC | GCT | TTG | GAT | GAC | ATC | ATA |
| (TC) <sub>7</sub> | AAC | AAC | TTC | ATA | GAC | CCT | CCA | CTG | CGC | CCT | TCT | GTG | GAC | CCA | AAG | CAC | GTC | CTC | TCC | AAC |
| SNP               | AAC | AAC | TTC | ATA | GAC | CCT | CCA | CTG | CGC | CCT | TCT | GTG | GAC | CCA | AAG | CAC | GTC | CTC | TCC | AAC |
| (TC) <sub>7</sub> | AAC | TTT | GCT | CCG | GTT | GAT | GAG | CTT | CCT | CCG | ACC | GAG | TGT | GAG | ATC | ATA | CAG | GGC | TCC | CTA |
| SNP               | AAC | TTT | GCT | CCG | GTT | GAT | GAG | CTT | CCT | CCG | ACC | GAG | TGT | GAG | ATC | ATA | CAG | GGC | TCC | CTA |
| (TC) <sub>7</sub> | CCG | CCG | TGC | CTC | GAC | GGT | GCC | TAC | ATC | CGC | AAT | GGC | CCG | AAC | CCG | CAG | TAC | CTT | CCG | CGT |
| SNP               | CCG | CCG | TGC | CTC | GAC | GGT | GCC | TAC | ATC | CGC | AAT | GGC | CCG | AAC | CCG | CAG | TAC | CTT | CCG | CGT |
| (TC) <sub>7</sub> | GGG | CCC | TAC | CAC | CTG | TTT | GAC | GGA | GAC | GGC | ATG | CTT | CAC | TCT | GTT | AGG | ATC | TCC | AAA | GGC |
| SNP               | GGG | CCC | TAC | CAC | CTG | TTT | GAC | GGA | GAC | GGC | ATG | CTT | CAC | TCT | GTT | AGG | ATC | TCC | AAA | GGC |
| (TC) <sub>7</sub> | CGT | GCC | GTG | CTG | TGC | AGC | CGC | TAT | GTC | AAG | ACC | TAC | AAA | TAC | ACC | ATT | GAG | CGT | GAT | GCT |
| SNP               | CGT | GCC | GTG | CTG | TGC | AGC | CGC | TAT | GTC | AAG | ACC | TAC | AAA | TAC | ACC | ATT | GAG | CGT | GAT | GCT |
| (TC) <sub>7</sub> | GGC | TAC | CCT | ATT | CTT | CCC | AGC | GTC | TTC | TCT | GGC | TTC | AAC | GGC | CTC | ACT | GCC | TCC | GCC | ACA |
| SNP               | GGC | TAC | CCT | ATT | CTT | CCC | AGC | GTC | TTC | TCT | GGC | TTC | AAC | GGC | CTC | ACT | GCC | TCC | GCC | ACA |
| (TC) <sub>7</sub> | CGT | GGC | GCT | CTC | TCC | GCT | GCC | CGC | GTC | TTT | ACA | GGC | CAA | TAC | AAT | CCT | GCT | AAT | GGC | ATT |
| SNP               | CGT | GGC | GCT | CTC | TCC | GCT | GCC | CGC | GTC | TTT | ACA | GGC | CAA | TAC | AAT | CCT | GCT | AAT | GGC | ATT |
| (TC) <sub>7</sub> | GGT | CTT | GCA | AAC | ACA | AGT | TTG | GCT | TTC | TTT | GGC | AAC | CAA | CTT | TAT | GCG | CTT | GGC | GAG | TCT |
| SNP               | GGT | CTT | GCA | AAC | ACA | AGT | TTG | GCT | TTC | TTT | GGC | AAC | CAA | CTT | TAT | GCG | CTT | GGC | GAG | TCT |
| (TC) <sub>7</sub> | GAT | CTC | CCT | TAT | TCT | TTG | CGT | TTG | ACA | TCC | AAT | GGA | GAT | ATC | CAA | ACT | CTG | GGA | CGC | CAT |
| SNP               | GAT | CTC | CCT | TAT | TCT | TTG | CGT | TTG | ACA | TCC | AAT | GGA | GAT | ATC | CAA | ACT | CTG | GGA | CGC | CAT |
| (TC) <sub>7</sub> | GAT | TTT | GAT | GGC | AAG | CTC | TTC | ATG | AGC | ATG | ACG | GCT | CAT | CCA | AAG | ATA | GAC | CCT | GAA | ACA |
| SNP               | GAT | TTT | GAT | GGC | AAG | CTC | TTC | ATG | AGC | ATG | ACG | GCT | CAT | CCA | AAG | ATA | GAC | CCT | GAA | ACA |
| (TC) <sub>7</sub> | GGG | GAG | GCC | TTT | GCC | TTC | CGC | TAC | GGC | CCC | TTG | CCT | CCA | TTT | CTA | ACA | TAC | TTT | CGG | TTT |
| SNP               | GGG | GAG | GCC | TTT | GCC | TTC | CGC | TAC | GGC | CCC | TTG | CCT | CCA | TTT | CTA | ACA | TAC | TTT | CGG | TTT |
| (TC) <sub>7</sub> | GAT | GCA | AAC | GGC | ACA | AAG | CAG | CCA | GAC | GTG | CCC | ATA | TTT | TCT | ATG | GTC | ACT | CCA | TCG | TTC |
| SNP               | GAT | GCA | AAC | GGC | ACA | AAG | CAG | CCA | GAC | GTG | CCC | ATA | TTT | TCT | ATG | GTC | ACT | CCA | TCG | TTC |
| (TC) <sub>7</sub> | CTC | CAC | GAC | TTT | GCA | ATC | ACA | AAA | AAA | TAT | GCC | ATC | TTT | GTT | GAC | ATA | CAA | ATT | GGC | ATG |
| SNP               | CTC | CAC | GAC | TTT | GCA | ATC | ACA | AAA | AAA | TAT | GCC | ATC | TTT | GTT | GAC | ATA | CAA | ATT | GGC | ATG |
| (TC) <sub>7</sub> | AAC | CCA | ATT | GAC | ATG | ATC | ACC | AAA | GGA | GCA | TCG | CCT | GTT | GGC | TTG | GAC | CCT | TCC | AAG | GTG |
| SNP               | AAC | CCA | ATT | GAC | ATG | ATC | ACC | AAA | GGA | GCA | TCG | CCT | GTT | GGC | TTG | GAC | CCT | TCC | AAG | GTG |
| (TC) <sub>7</sub> | CCT | AGA | ATC | GGA | GTG | ATC | CCG | CGA | TAC | GCG | AAA | GAT | GAA | ACG | GAG | ATG | AGG | TGG | TTT | GAT |
| SNP               | CCT | AGA | ATC | GGA | GTG | ATC | CCG | CGA | TAC | GCG | AAA | GAT | GAA | ACG | GAG | ATG | AGG | TGG | TTT | GAT |
| (TC) <sub>7</sub> | GTG | CCT | GGT | TTT | AAC | ATC | ATA | CAT | GCC | ATC | AAT | GCT | TGG | GAT | GAA | GAG | GAT | GCT | ATA | GTG |
| SNP               | GTG | CCT | GGT | TTT | AAC | ATC | ATA | CAT | GCC | ATC | AAT | GCT | TGG | GAT | GAA | GAG | GAT | GCT | ATA | GTG |
| (TC) <sub>7</sub> | ATG | GTG | GCA | CCA | AAC | ATT | TTG | TCA | GCA | GAG | CAC | ACA | ATG | GAG | AGA | ATG | GAT | TTG | ATC | CAT |
| SNP               | ATG | GTG | GCA | CCA | AAC | ATT | TTG | TCA | GCA | GAG | CAC | ACA | ATG | GAG | AGA | ATG | GAT | TTG | ATC | CAT |
| (TC) <sub>7</sub> | GCT | TCG | GTT | GAG | AAA | GTT | AGG | ATT | GAT | CTC | AAG | ACA | GGG | ATT | GTG | TCA | AGG | CAA | CCC | ATC |
| SNP               | GCT | TCG | GTT | GAG | AAA | GTT | AGG | ATT | GAT | CTC | AAG | ACA | GGG | ATT | GTG | TCA | AGG | CAA | CCC | ATC |
| (TC) <sub>7</sub> | TCC | ACA | AGA | AAT | CTA | GAC | TTT | GCT | GTG | TTC | AAT | CCG | GCT | TAT | GTG | GGG | AAG | AAG | AAC | AAG |
| SNP               | TCC | ACA | AGA | AAT | CTA | GAC | TTT | GCT | GTG | TTC | AAT | CCG | GCT | TAT | GTG | GGG | AAG | AAG | AAC | AAG |
| (TC) <sub>7</sub> | TAT | GTT | TAT | GCA | GCT | GTG | GGT | GAT | CCA | ATG | CCT | AAG | ATA | TCA | GGG | GTG | GTG | AAA | TTA | GAT |
| SNP               | TAT | GTT | TAT | GCA | GCT | GTG | GGT | GAT | CCA | ATG | CCT | AAG | ATA | TCA | GGG | GTG | GTG | AAA | TTA | GAT |
| (TC) <sub>7</sub> | GTG | TCC | AAT | GTG | GAG | CAC | AAG | GAG | TGT | ATA | GTG | GCT | AGC | AGG | ATG | TTT | GGG | CCA | GGG | TGC |
| SNP               | GTG | TCC | AAT | GTG | GAG | CAC | AAG | GAG | TGT | ATA | GTG | GCT | AGC | AGG | ATG | TTT | GGG | CCA | GGG | TGC |
| (TC) <sub>7</sub> | TAT | GGG | GGT | GAG | CCG | TTT | TTC | GTG | GCT | AGA | GAG | CCC | GAG | AAT | CCG | GAG | GCA | GAT | GAG | GAC |
| (TC) <sub>7</sub> | GAT | GGG | TAC | GTG | GTG | ACG | TAT | GTT | CAT | GAT | GAG | AAG | GCA | GGA | GAA | TCA | AGC | TTC | TTG | GTG |
| (TC) <sub>7</sub> | ATG | GAT | GCC | AAG | TCT | CCT | CGG | CTT | GAT | ATT | GTG | GCA | GAT | GTG | AGG | CTG | CCC | CGG | CGG | GTG |
| (TC) <sub>7</sub> | CCT | TAT | GGC | TTC | CAT | GGA | CTC | TTT | GTG | AAG | GAA | AGT | GAT | CTC | AAC | AAG | TTG | TAG |     |     |

**Figure S3. Premature stop codons.** Comparison of nucleotide sequence of the (TC)<sub>8</sub> PpCCD4 allele (pink), and the (TC)<sub>7</sub>+SNP allele (green) as compared with the (TC)<sub>7</sub> allele (black). Premature stop codons are indicated by (X).
